# Supplementary material for: Plasma tailored reactive nitrogen species in MOF derived carbon materials for hybrid sodium–air batteries
Source: Royal Society of Chemistry journal article supplement (doi:10.1039/d1dt00807b), 2021-01-01
Supplement: d1dt00807b1.pdf [file d1dt00807b1.pdf]

### Supplementary Information

#### **Plasma tailor reactive nitrogen species in MOF derived carbon materials for hybrid sodium-air battery**

Xiecheng Yang<sup>a†</sup>, Fengmei Su<sup>a†</sup>, Minjie Hou<sup>a</sup>, Da Zhang<sup>a</sup>, Yongnian Dai<sup>a</sup>, Feng Liang<sup>a,b\*</sup>

*a Faculty of Metallurgical and Energy Engineering, Kunming University of Science and Technology, Kunming 650093, China*

*b State Key Laboratory of Complex Nonferrous Metal Resources Clean Utilization, Kunming University of Science and Technology, Kunming 650093, China*

*†: The contributions of Xiecheng Yang and Fengmei Su are equal and they are co-first authors*

*Email: liangfeng@kust.edu.cn*

Table S1. The ratio of pyridinic-N to pyrrolic-N, total-N to total-Co, the relative contents of Co-N<sub>x</sub> sites, Co-Co bonds, for MOF-NCNTs, MOF-NCNTs-N<sub>2</sub>-2, MOF-NCNTs-N<sub>2</sub>-4, and MOF-NCNTs-N<sub>2</sub>-8.

| Sample                      | pyridinic-N/<br>pyrrolic-N | total-N/total-Co | Co-N <sub>x</sub> sites | Co-Co bonds |
|-----------------------------|----------------------------|------------------|-------------------------|-------------|
| MOF-NCNTs                   | 0.93                       | 2.92             | 50.07%                  | 30.51%      |
| MOF-NCNTs-N <sub>2</sub> -2 | 0.97                       | 3.02             | 53.60%                  | 32.59%      |
| MOF-NCNTs-N <sub>2</sub> -4 | 1.11                       | 3.16             | 52.71%                  | 35.77%      |
| MOF-NCNTs-N <sub>2</sub> -8 | 0.86                       | 2.99             | 53.12%                  | 31.26%      |

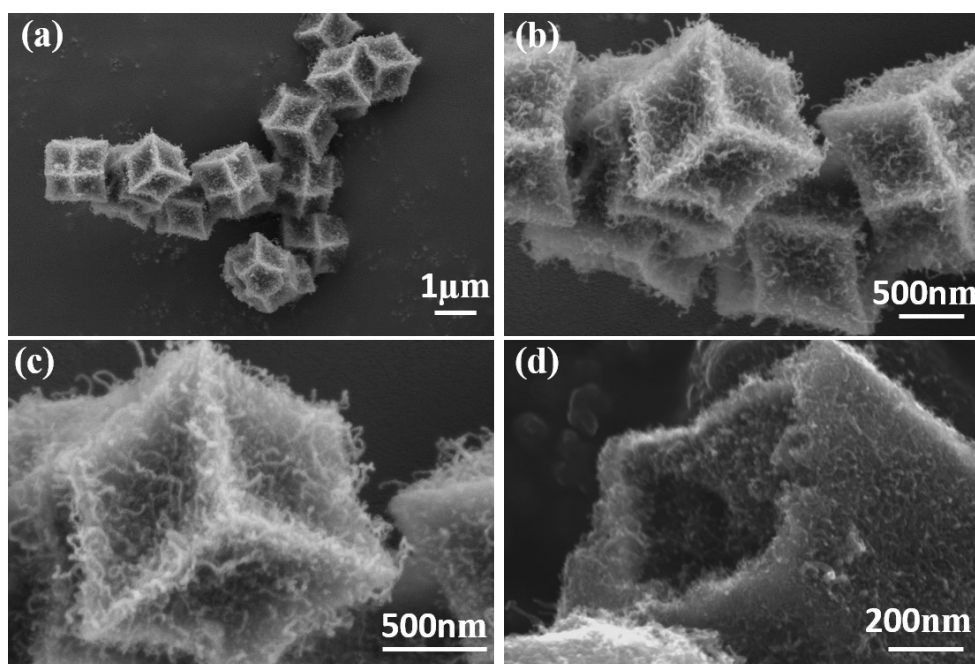

Figure S1. FESEM images of MOF-NCNTs.

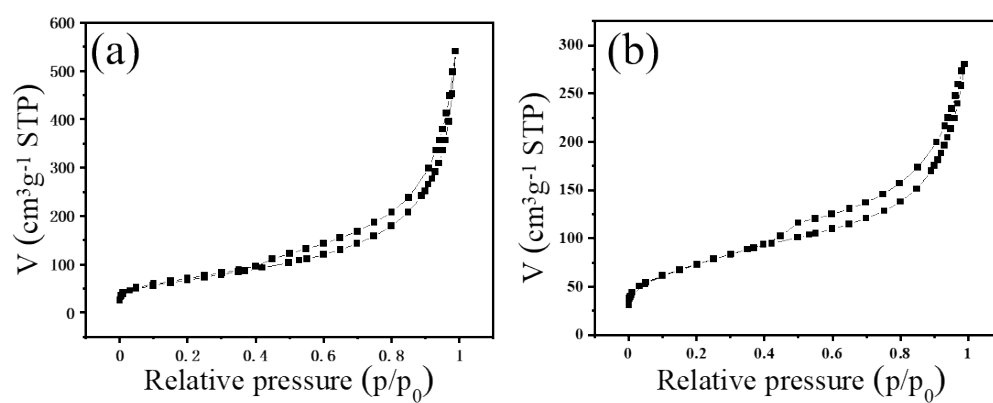

Figure S2.  $N_2$  adsorption-desorption isotherms of (a) MOF-NCNTs; (b) MOF-NCNTs-  $N_2$ -4.

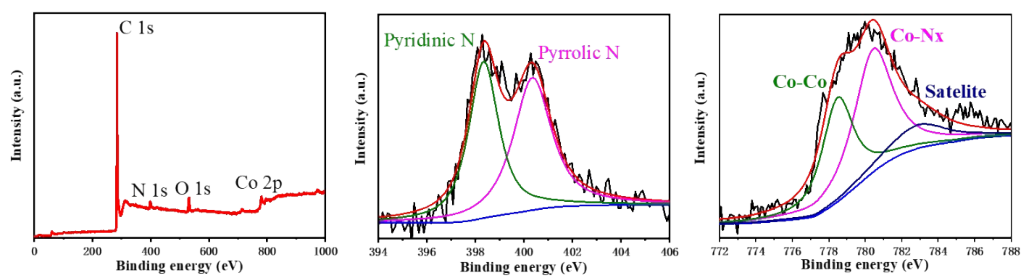

Figure S3. (a)XPS survey spectra and high-resolution spectra of MOF-NCNTs; (b)N 1s; (c)Co

2p<sub>3/2</sub>.

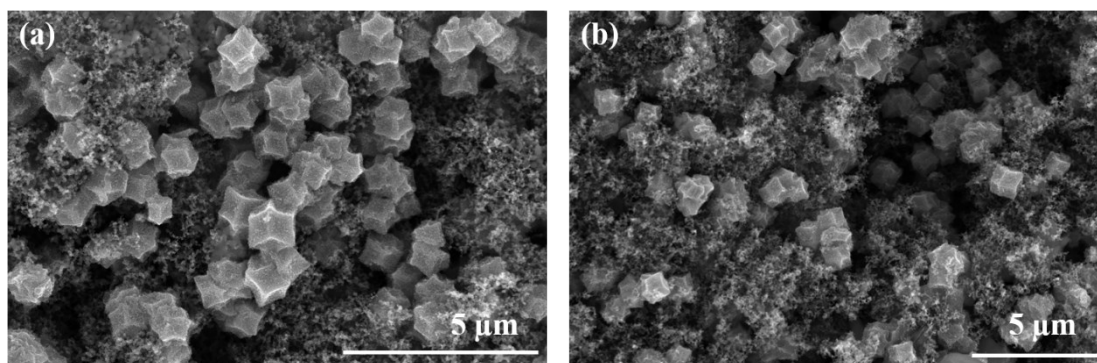

Figure S4. FESEM images of MOF-NCNTs-N<sub>2</sub>-4 (a) Before cycle, (b) After 150 cycles.
